# Supplementary material for: In situ growth of Ag/Ag2O nanoparticles on g-C3N4 by a natural carbon nanodot-assisted green method for synergistic photocatalytic activity
Source: Royal Society of Chemistry journal article supplement (doi:10.1039/c5ra22176e), 2015-12-23
Supplement: c5ra22176e1.pdf [file c5ra22176e1.pdf]

***In-situ* growth of Ag/Ag<sub>2</sub>O nanoparticles on g-C<sub>3</sub>N<sub>4</sub> by a natural carbon  
nanodots-assisted green method for synergistic photocatalytic activity**

Zhifeng Jiang<sup>†,‡</sup> and Jimin Xie<sup>\*,†</sup>

<sup>†</sup>School of Chemistry and Chemical Engineering, Jiangsu University, Zhenjiang,  
212013, P.R.China

<sup>‡</sup>Department of Chemical Engineering, Columbia University, New York, NY 10027,  
United States

First author e-mail: [ntjiangzf@sina.com](mailto:ntjiangzf@sina.com)

**\*Corresponding author:** Jimin Xie

Tel.: +86 11 88791708; fax: +86 11 88791800;

E-mail address: [xiejm391@sohu.com](mailto:xiejm391@sohu.com)

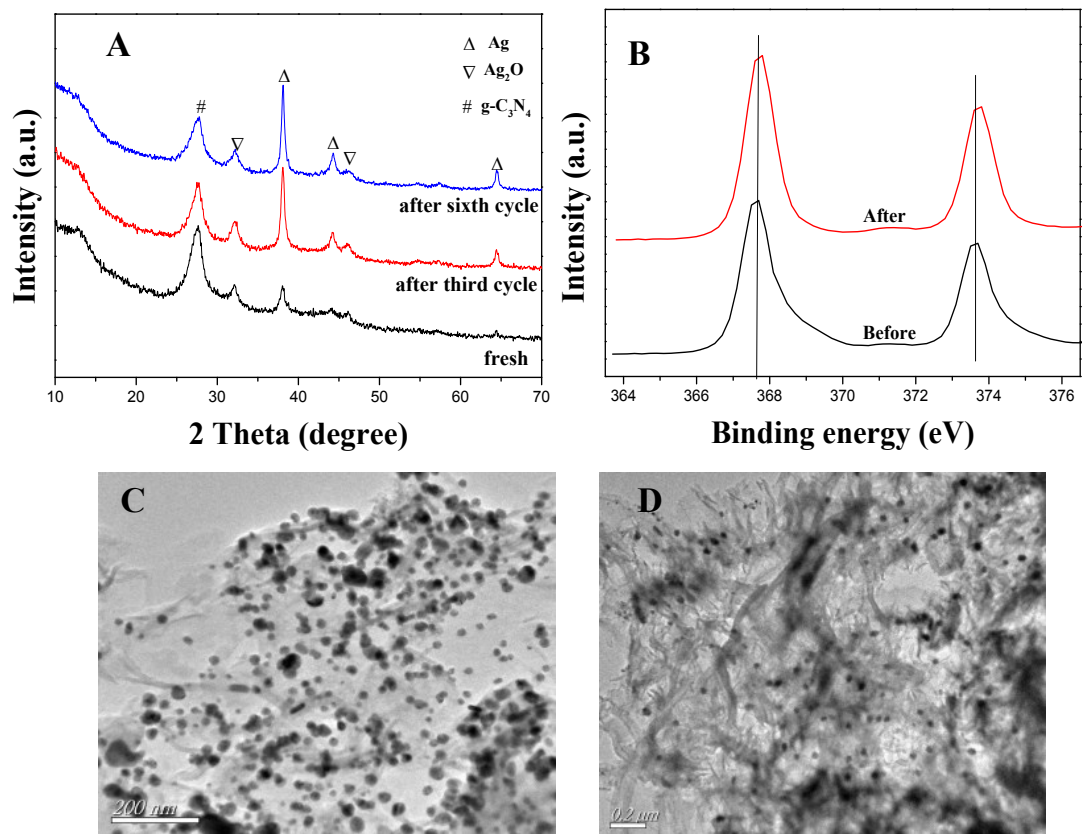

**Fig. S1** XRD (A), XPS (B, Ag 3d) and TEM images (C-before reaction, D-after sixth reaction) of Ag/Ag<sub>2</sub>O@g-C<sub>3</sub>N<sub>4</sub> ternary composite.
